# Supplementary material for: A nano silver-xerogel (Ag nps@modified TEOS) as a newly developed nanocatalyst in the synthesis of benzopyranopyrimidines (with secondary and primary amines) and gem-bisamides
Source: Royal Society of Chemistry journal article supplement (doi:10.1039/c7dt00822h), 2017-01-01
Supplement: c7dt00822h1.pdf [file c7dt00822h1.pdf]

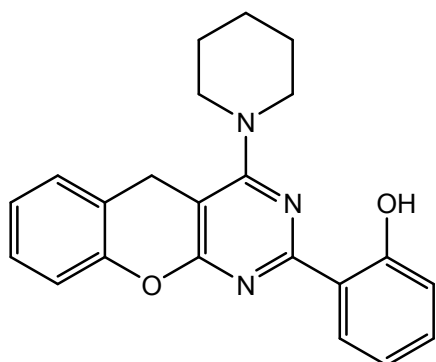

piperidine benzopyrimidine  
1-S-3-G

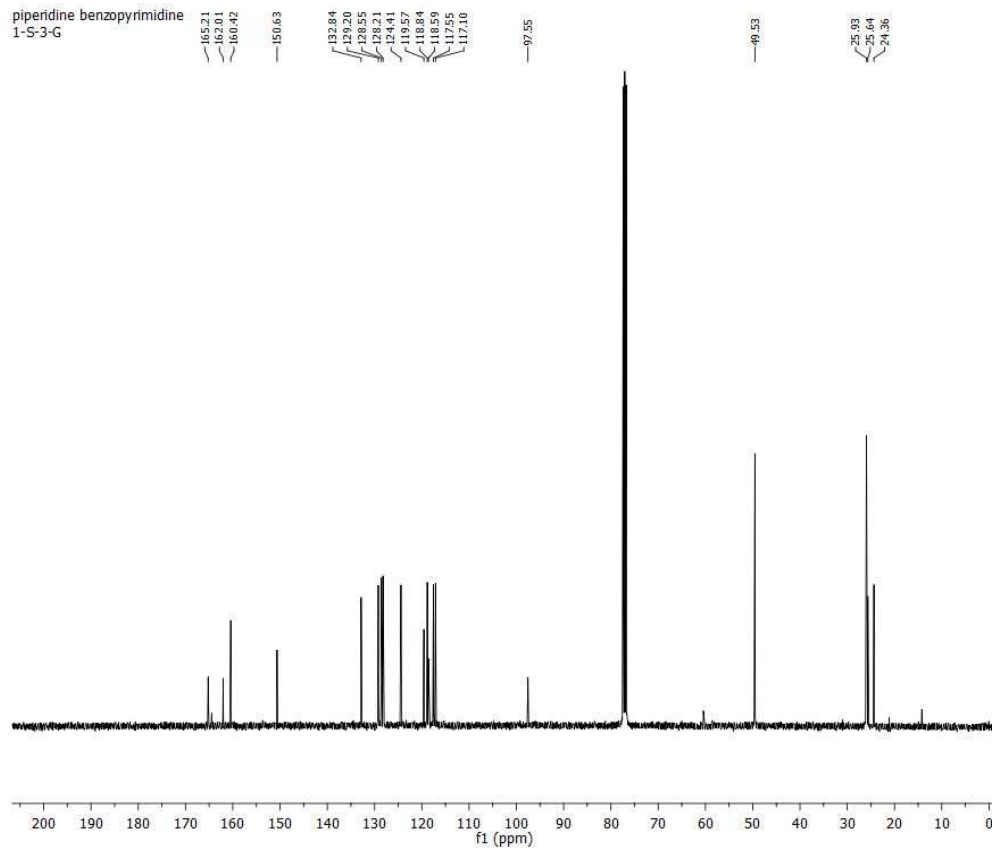

| Parameter                 | Value                                                                                 |
|---------------------------|---------------------------------------------------------------------------------------|
| 1 Data File Name          | C:/Users/gateway/Desktop/pyranopyrimidines/Spectras/piperidine benzopyrimidine/16/fid |
| 2 Title                   | piperidine benzopyrimidine                                                            |
| 3 Comment                 | 1-S-3-G                                                                               |
| 4 Origin                  | Bruker BioSpin GmbH                                                                   |
| 5 Owner                   | nmsu                                                                                  |
| 6 Site                    |                                                                                       |
| 7 Spectrometer            | spect                                                                                 |
| 8 Author                  |                                                                                       |
| 9 Solvent                 | CDCl3                                                                                 |
| 10 Temperature            | 0.0                                                                                   |
| 11 Pulse Sequence         | zgpg30                                                                                |
| 12 Number of Scans        | 948                                                                                   |
| 13 Receiver Gain          | 199                                                                                   |
| 14 Relaxation Delay       | 2.0000                                                                                |
| 15 Pulse Width            | 9.8000                                                                                |
| 16 Acquisition Time       | 1.3631                                                                                |
| 17 Acquisition Date       | 2016-02-17T14:49:42                                                                   |
| 18 Modification Date      | 2016-02-17T14:49:44                                                                   |
| 19 Spectrometer Frequency | 100.61                                                                                |
| 20 Spectral Width         | 24038.5                                                                               |
| 21 Lowest Frequency       | -1958.9                                                                               |
| 22 Nucleus                | 13C                                                                                   |
| 23 Acquired Size          | 32768                                                                                 |
| 24 Spectral Size          | 65536                                                                                 |

<sup>13</sup>CNMR

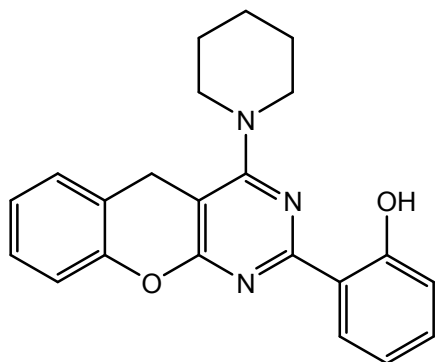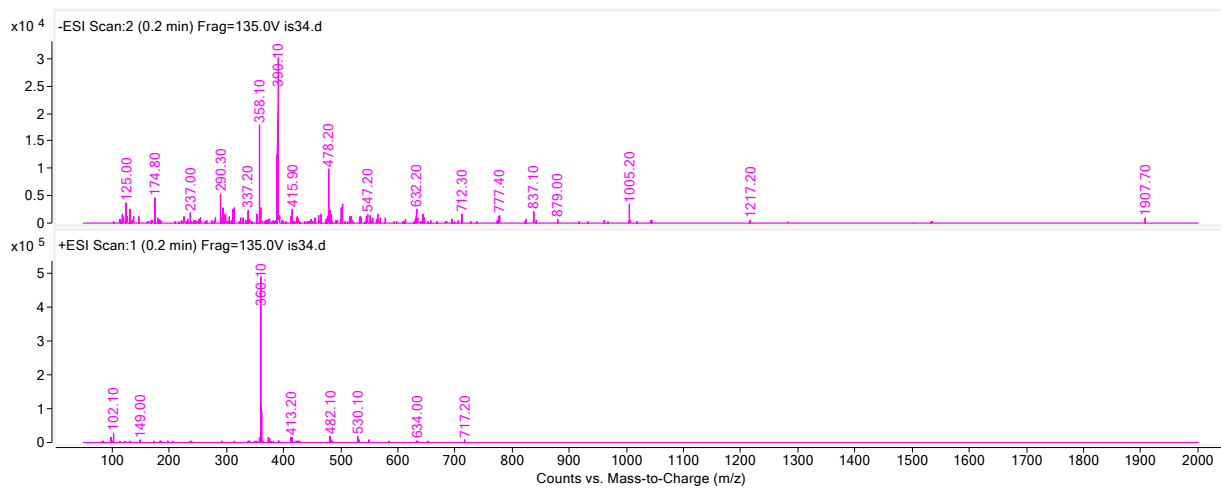

Mass spectra

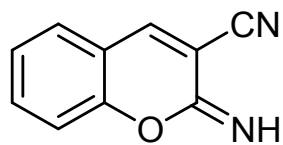

Immine intermediate A trapped using primary amine  
p-methoxyaniline for the synthesis of benzopyranopyrimidines

Ani benz pyrimidine immine intermediate

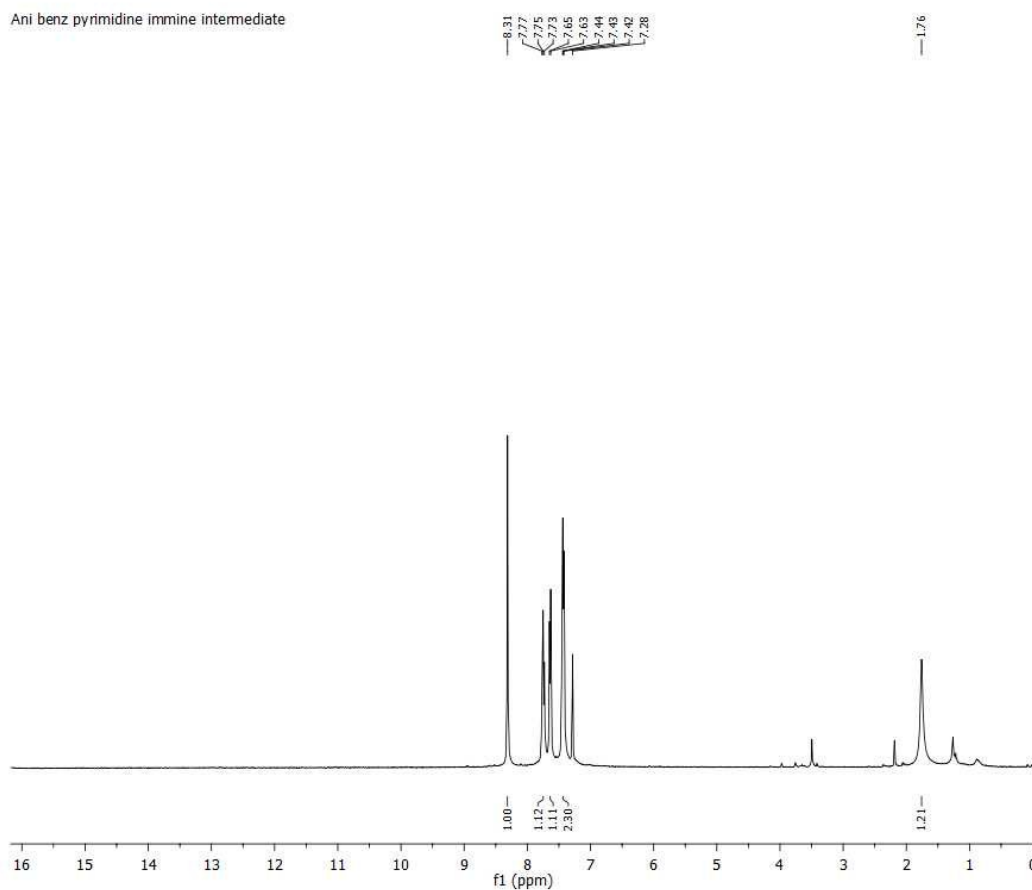

| Parameter                 | Value                                                                                                                                           |
|---------------------------|-------------------------------------------------------------------------------------------------------------------------------------------------|
| 1 Data File Name          | C:/Users/gateway/Desktop/18-feb-2017 contains all desktop matter/ pyranopyrimidines/ Spectras/ Ani benz pyrimidine immine intermediate/ 11/ fid |
| 2 Title                   | Ani benz pyrimidine immine intermediate                                                                                                         |
| 3 Comment                 | ANI-BP                                                                                                                                          |
| 4 Origin                  | Bruker BioSpin GmbH                                                                                                                             |
| 5 Owner                   | nmrsu                                                                                                                                           |
| 6 Site                    |                                                                                                                                                 |
| 7 Spectrometer spect      |                                                                                                                                                 |
| 8 Author                  |                                                                                                                                                 |
| 9 Solvent                 | CDCl3                                                                                                                                           |
| 10 Temperature            | 0.0                                                                                                                                             |
| 11 Pulse Sequence         | zg30                                                                                                                                            |
| 12 Number of Scans        | 16                                                                                                                                              |
| 13 Receiver Gain          | 199                                                                                                                                             |
| 14 Relaxation Delay       | 1.0000                                                                                                                                          |
| 15 Pulse Width            | 15.0000                                                                                                                                         |
| 16 Acquisition Time       | 4.0894                                                                                                                                          |
| 17 Acquisition Date       | 2016-04-21T14:38:00                                                                                                                             |
| 18 Modification Date      | 2016-04-21T14:38:01                                                                                                                             |
| 19 Spectrometer Frequency | 400.13                                                                                                                                          |
| 20 Spectral Width         | 8012.8                                                                                                                                          |
| 21 Lowest Frequency       | -1535.4                                                                                                                                         |
| 22 Nucleus                | 1H                                                                                                                                              |
| 23 Acquired Size          | 32768                                                                                                                                           |
| 24 Spectral Size          | 65536                                                                                                                                           |

<sup>1</sup>H NMR

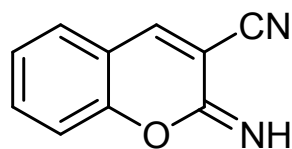

Ani benz pyrimidine immine intermediate

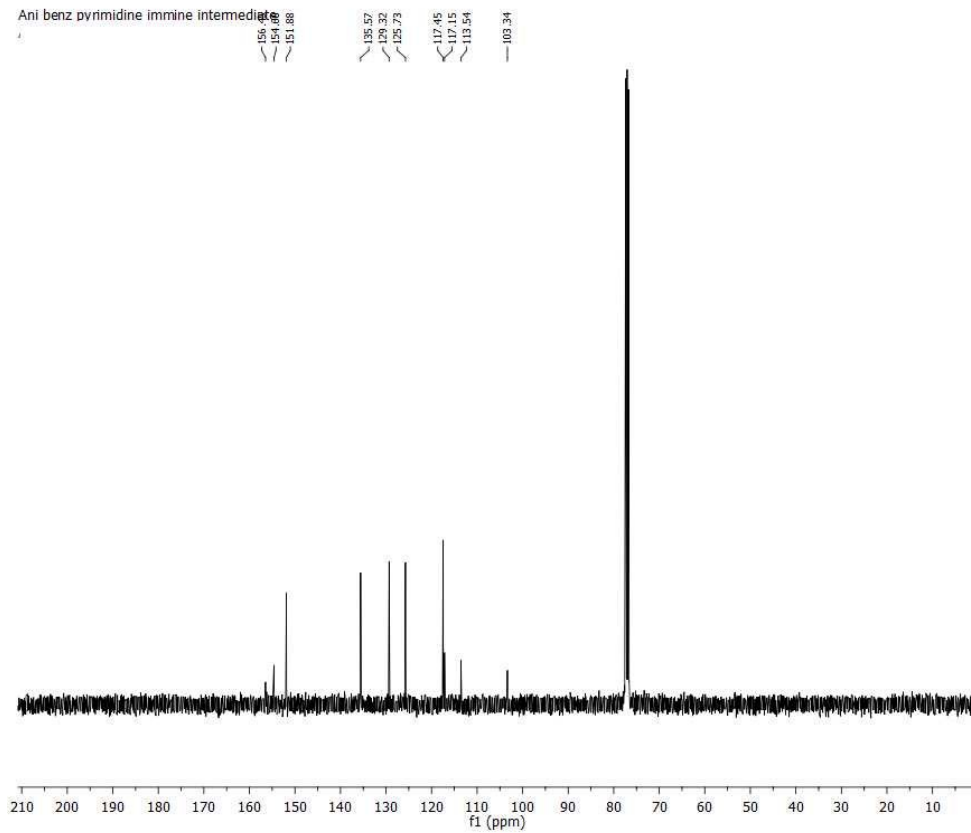

| Parameter                 | Value                                                                                                                                         |
|---------------------------|-----------------------------------------------------------------------------------------------------------------------------------------------|
| 1 Data File Name          | C:/Users/gateway/Desktop/18-feb-2017 contains all desktop matter/pyranopyrimidines/Spectras/ Ani benz pyrimidine immine intermediate/ 12/ fid |
| 2 Title                   | Ani benz pyrimidine immine intermediate                                                                                                       |
| 3 Comment                 | ANI-BP                                                                                                                                        |
| 4 Origin                  | Bruker BioSpin GmbH                                                                                                                           |
| 5 Owner                   | mrsu                                                                                                                                          |
| 6 Site                    |                                                                                                                                               |
| 7 Spectrometer            | spect                                                                                                                                         |
| 8 Author                  |                                                                                                                                               |
| 9 Solvent                 | CDCl3                                                                                                                                         |
| 10 Temperature            | 0.0                                                                                                                                           |
| 11 Pulse Sequence         | zgpg30                                                                                                                                        |
| 12 Number of Scans        | 455                                                                                                                                           |
| 13 Receiver Gain          | 199                                                                                                                                           |
| 14 Relaxation Delay       | 2.0000                                                                                                                                        |
| 15 Pulse Width            | 9.8000                                                                                                                                        |
| 16 Acquisition Time       | 1.3631                                                                                                                                        |
| 17 Acquisition Date       | 2016-04-21T15:03:20                                                                                                                           |
| 18 Modification Date      | 2016-04-21T15:04:46                                                                                                                           |
| 19 Spectrometer Frequency | 100.61                                                                                                                                        |
| 20 Spectral Width         | 24038.5                                                                                                                                       |
| 21 Lowest Frequency       | -1958.9                                                                                                                                       |
| 22 Nucleus                | 13C                                                                                                                                           |
| 23 Acquired Size          | 32768                                                                                                                                         |
| 24 Spectral Size          | 65536                                                                                                                                         |

13 C NMR

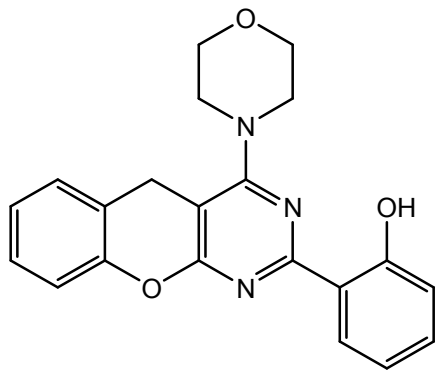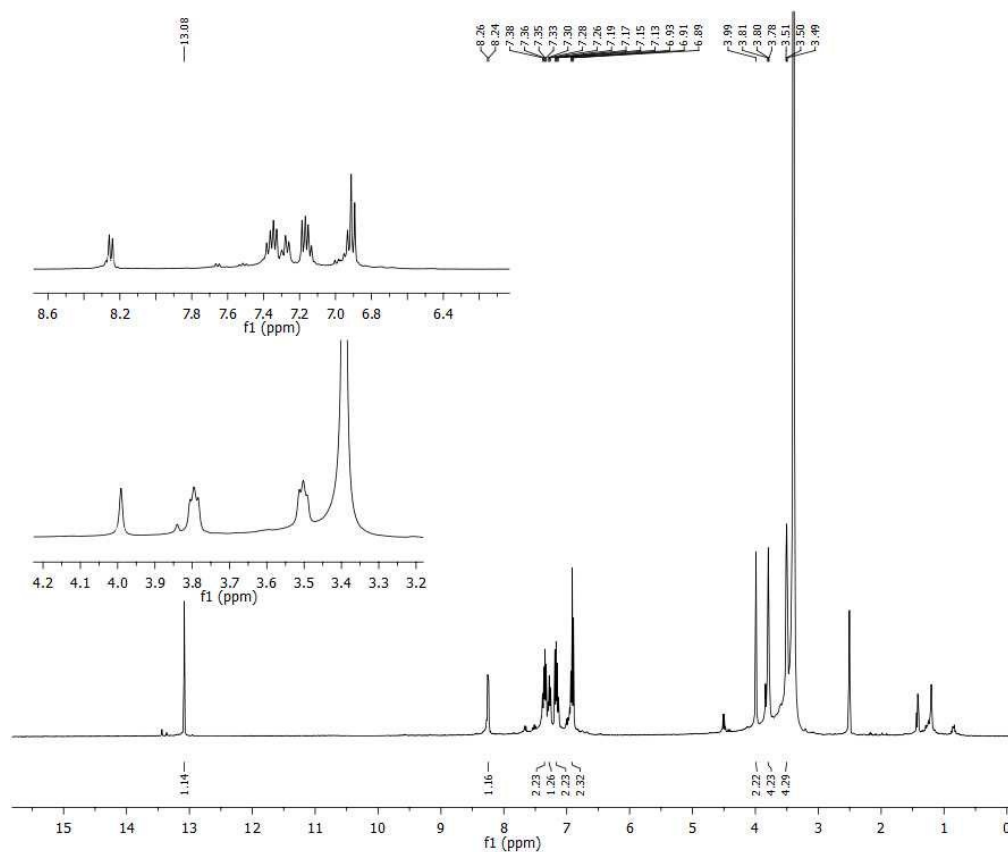

| Parameter                 | Value                                                            |
|---------------------------|------------------------------------------------------------------|
| 1 Data File Name          | C:/Users/gateway/Desktop/pyranopyrimidines/Spectras/M.BP/ 1/ fid |
| 2 Title                   | M.BP                                                             |
| 3 Comment                 | mor-bp                                                           |
| 4 Origin                  | Bruker BioSpin GmbH                                              |
| 5 Owner                   | nmrsu                                                            |
| 6 Site                    |                                                                  |
| 7 Spectrometer            | spect                                                            |
| 8 Author                  |                                                                  |
| 9 Solvent                 | DMSO                                                             |
| 10 Temperature            | 297.9                                                            |
| 11 Pulse Sequence         | zg30                                                             |
| 12 Number of Scans        | 16                                                               |
| 13 Receiver Gain          | 121                                                              |
| 14 Relaxation Delay       | 1.0000                                                           |
| 15 Pulse Width            | 15.0000                                                          |
| 16 Acquisition Time       | 4.0894                                                           |
| 17 Acquisition Date       | 2016-09-19T14:36:07                                              |
| 18 Modification Date      | 2016-09-19T14:36:08                                              |
| 19 Spectrometer Frequency | 400.13                                                           |
| 20 Spectral Width         | 8012.8                                                           |
| 21 Lowest Frequency       | -1535.4                                                          |
| 22 Nucleus                | <sup>1</sup> H                                                   |
| 23 Acquired Size          | 32768                                                            |
| 24 Spectral Size          | 65536                                                            |

<sup>1</sup>H NMR

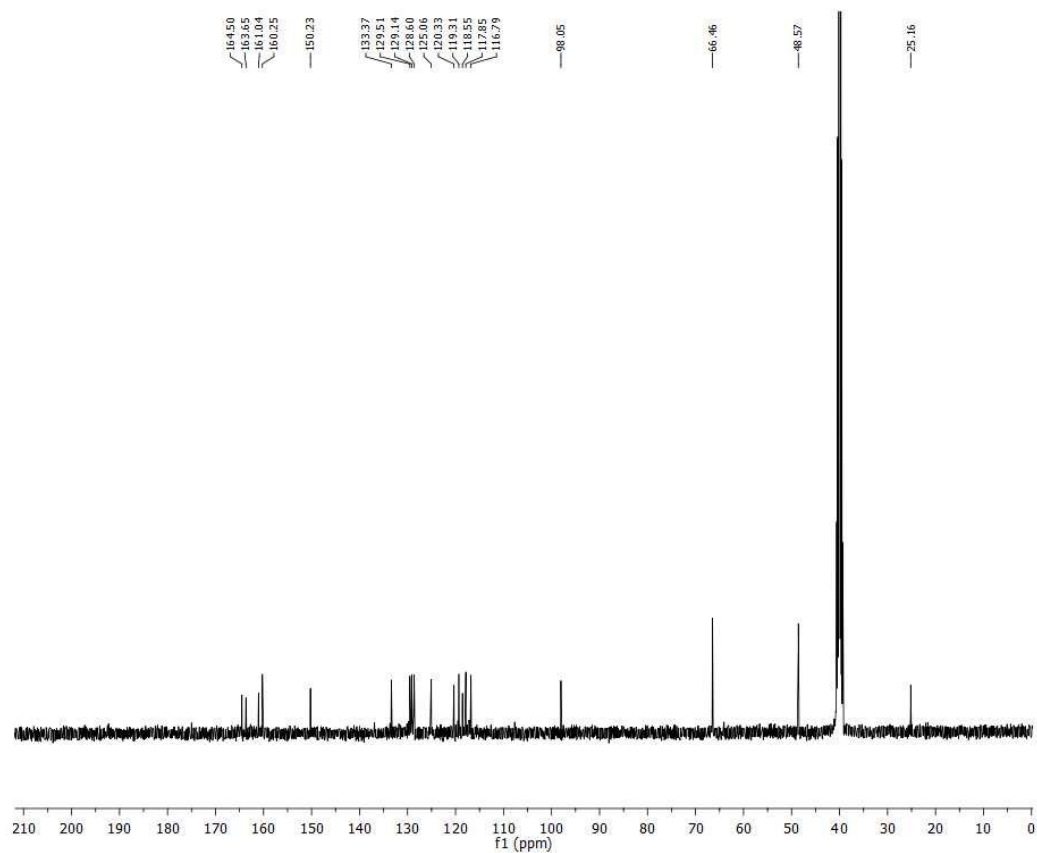

| Parameter                 | Value                                                          |
|---------------------------|----------------------------------------------------------------|
| 1 Data File Name          | C:/Users/gateway/Desktop/pyranopyrimidines/Spectras/M.BP/2/fid |
| 2 Title                   | M.BP                                                           |
| 3 Comment                 | mor-bp                                                         |
| 4 Origin                  | Bruker BioSpin GmbH                                            |
| 5 Owner                   | nmrsu                                                          |
| 6 Site                    |                                                                |
| 7 Spectrometer            | spect                                                          |
| 8 Author                  |                                                                |
| 9 Solvent                 | DMSO                                                           |
| 10 Temperature            | 301.1                                                          |
| 11 Pulse Sequence         | zgpg30                                                         |
| 12 Number of Scans        | 1024                                                           |
| 13 Receiver Gain          | 199                                                            |
| 14 Relaxation Delay       | 2.0000                                                         |
| 15 Pulse Width            | 9.8000                                                         |
| 16 Acquisition Time       | 1.3631                                                         |
| 17 Acquisition Date       | 2016-09-19T15:35:59                                            |
| 18 Modification Date      | 2016-09-19T15:36:00                                            |
| 19 Spectrometer Frequency | 100.61                                                         |
| 20 Spectral Width         | 24038.5                                                        |
| 21 Lowest Frequency       | -1958.9                                                        |
| 22 Nucleus                | 13C                                                            |
| 23 Acquired Size          | 32768                                                          |
| 24 Spectral Size          | 65536                                                          |

<sup>13</sup>CNMR

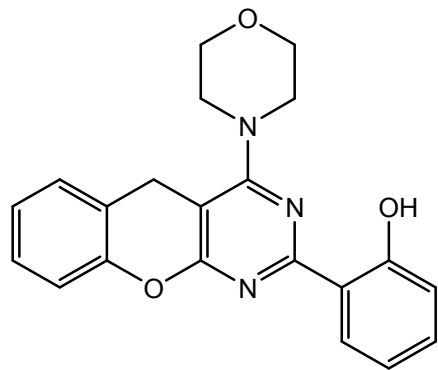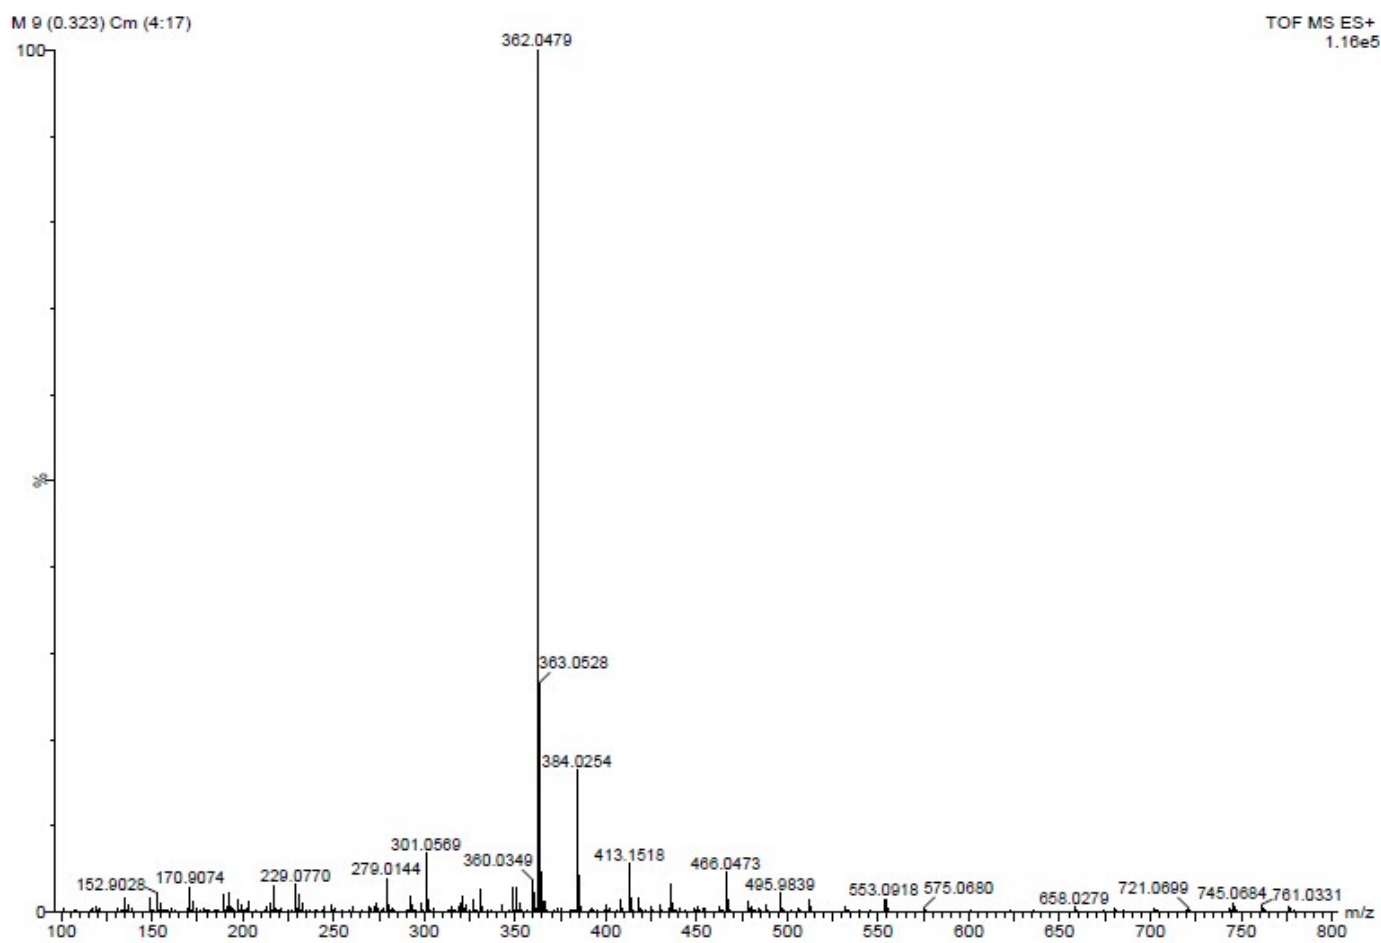

Mass spectra



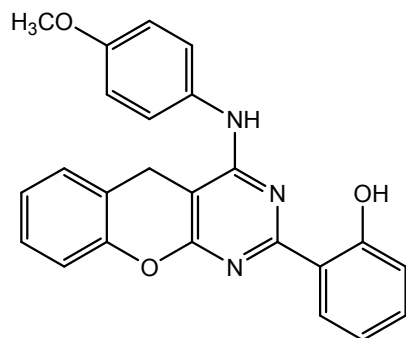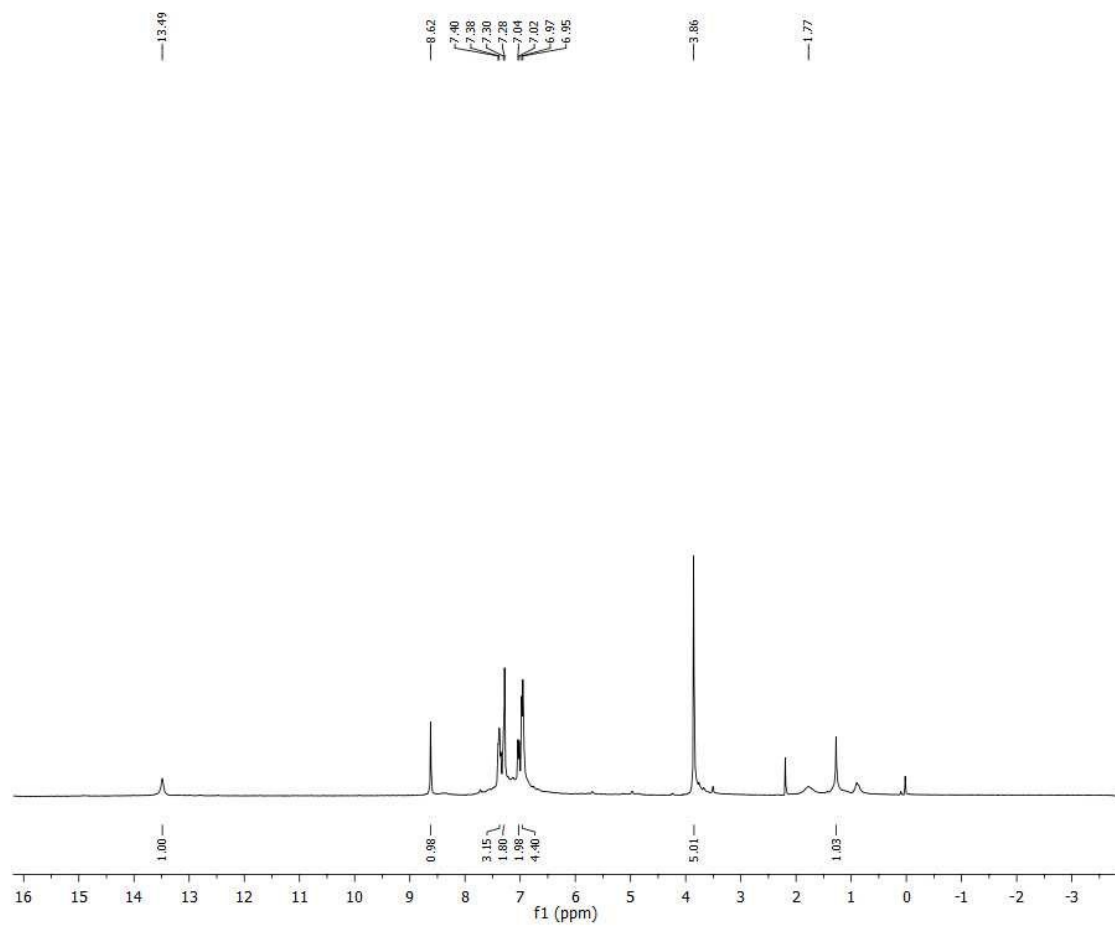

| Parameter                 | Value                                            |
|---------------------------|--------------------------------------------------|
| 1 Data File Name          | C:/Users/gateway/Desktop/ALL DESKTOP/1,2/ 1/ fid |
| 2 Title                   | 1,2                                              |
| 3 Comment                 | A-2                                              |
| 4 Origin                  | Bruker BioSpin GmbH                              |
| 5 Owner                   | nmrsu                                            |
| 6 Site                    |                                                  |
| 7 Spectrometer            | spect                                            |
| 8 Author                  |                                                  |
| 9 Solvent                 | CDCl3                                            |
| 10 Temperature            | 0.0                                              |
| 11 Pulse Sequence         | zg30                                             |
| 12 Number of Scans        | 16                                               |
| 13 Receiver Gain          | 121                                              |
| 14 Relaxation Delay       | 1.0000                                           |
| 15 Pulse Width            | 15.0000                                          |
| 16 Acquisition Time       | 4.0894                                           |
| 17 Acquisition Date       | 2016-03-18T12:48:56                              |
| 18 Modification Date      | 2016-03-18T12:48:57                              |
| 19 Spectrometer Frequency | 400.13                                           |
| 20 Spectral Width         | 8012.8                                           |
| 21 Lowest Frequency       | -1535.4                                          |
| 22 Nucleus                | 1H                                               |
| 23 Acquired Size          | 32768                                            |
| 24 Spectral Size          | 65536                                            |

1H NMR

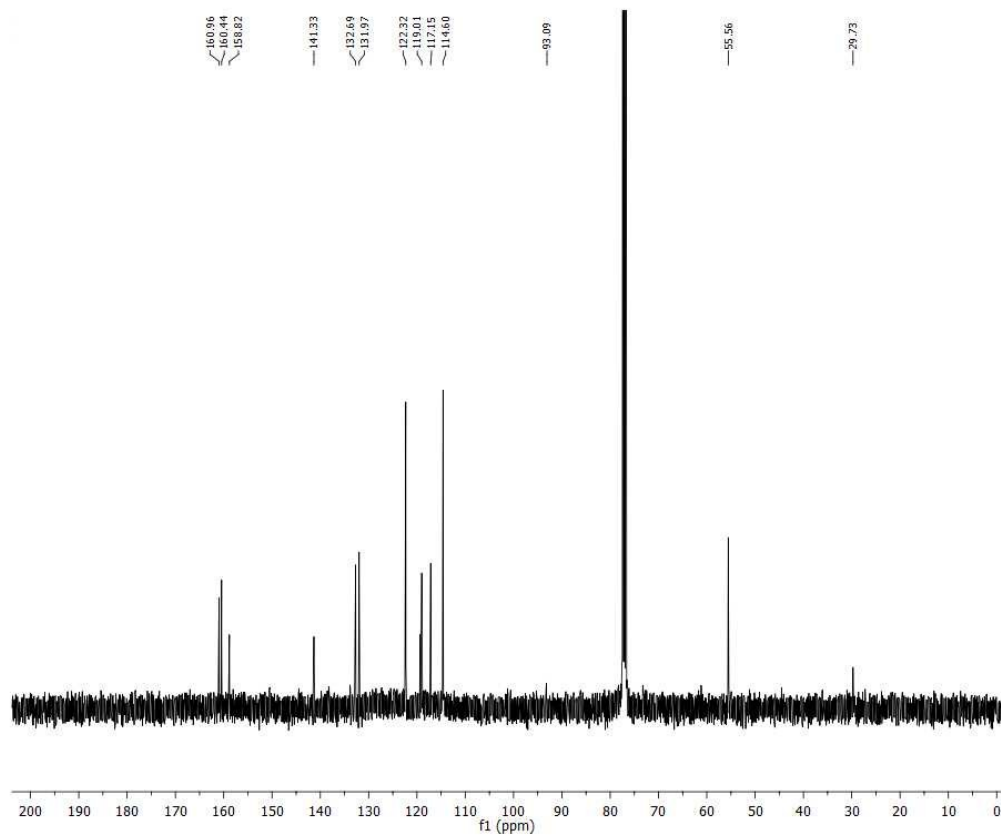

| Parameter                 | Value                                                                                 |
|---------------------------|---------------------------------------------------------------------------------------|
| 1 Data File Name          | C:/Users/gateway/Desktop/pyranopyrimidines/Spectras/Anisidine benzopyrimidine/ 2/ fid |
| 2 Title                   | Anisidine benzopyrimidine                                                             |
| 3 Comment                 | A-2                                                                                   |
| 4 Origin                  | Bruker BioSpin GmbH                                                                   |
| 5 Owner                   | nmrsu                                                                                 |
| 6 Site                    |                                                                                       |
| 7 Spectrometer            | spect                                                                                 |
| 8 Author                  |                                                                                       |
| 9 Solvent                 | CDCl <sub>3</sub>                                                                     |
| 10 Temperature            | 0.0                                                                                   |
| 11 Pulse Sequence         | zgpg30                                                                                |
| 12 Number of Scans        | 1024                                                                                  |
| 13 Receiver Gain          | 199                                                                                   |
| 14 Relaxation Delay       | 2.0000                                                                                |
| 15 Pulse Width            | 9.8000                                                                                |
| 16 Acquisition Time       | 1.3631                                                                                |
| 17 Acquisition Date       | 2016-03-18T13:17:25                                                                   |
| 18 Modification Date      | 2016-03-18T13:48:07                                                                   |
| 19 Spectrometer Frequency | 100.61                                                                                |
| 20 Spectral Width         | 24038.5                                                                               |
| 21 Lowest Frequency       | -1958.9                                                                               |
| 22 Nucleus                | <sup>13</sup> C                                                                       |
| 23 Acquired Size          | 32768                                                                                 |
| 24 Spectral Size          | 65536                                                                                 |

13C NMR

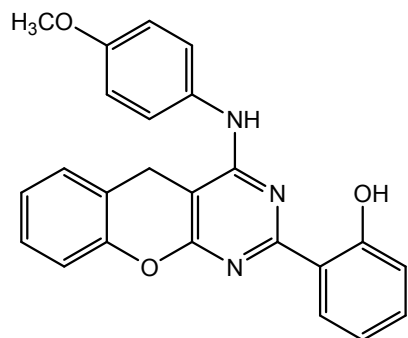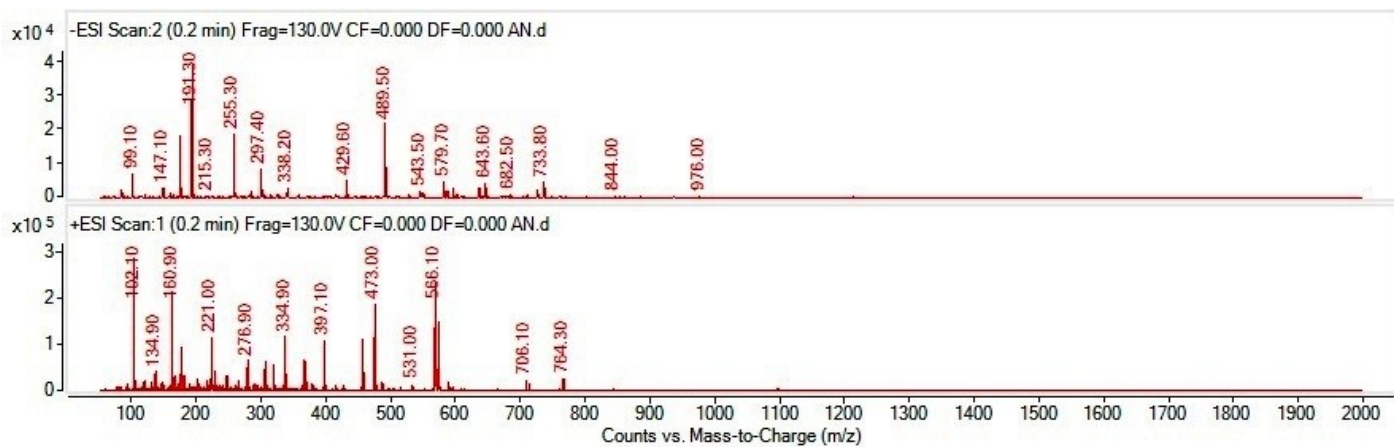

Mass Spectra

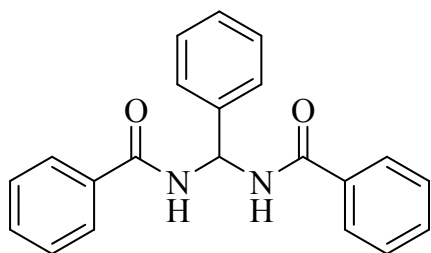

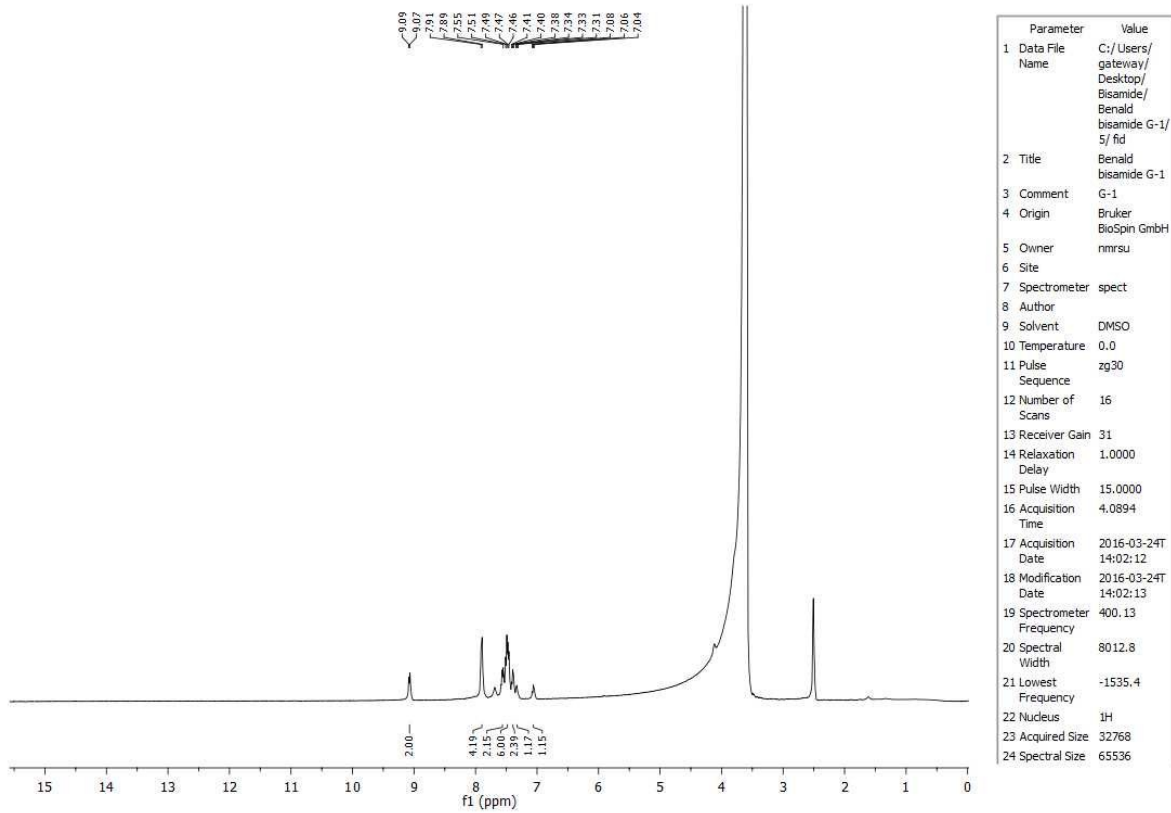

<sup>1</sup>H NMR

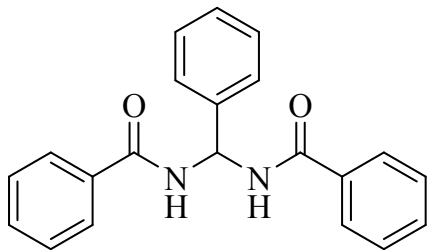

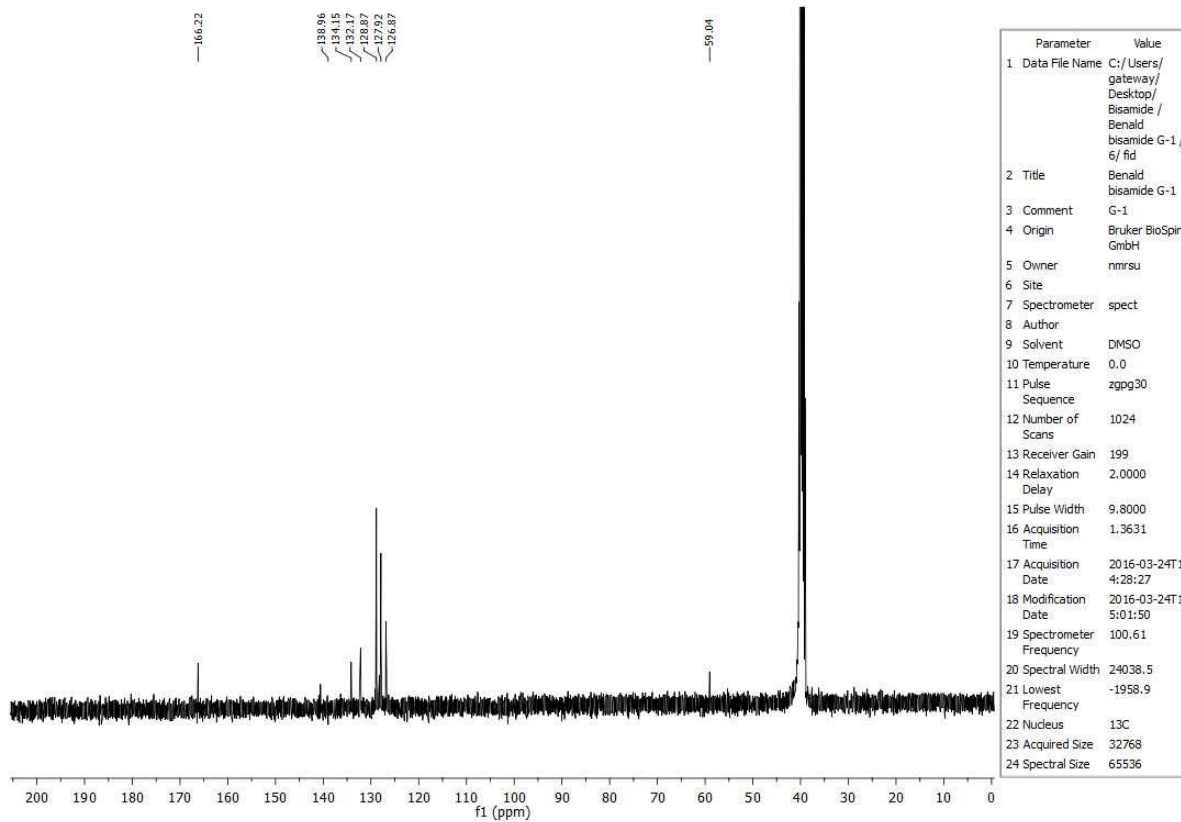

<sup>13</sup>CNMR

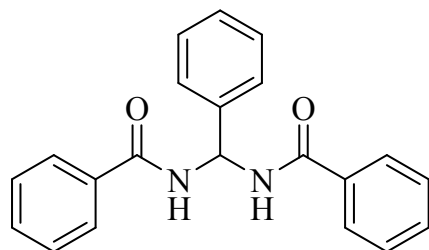

B 10 (0.357) Cm (7.13)

TOF MS ES+  
2.11e5

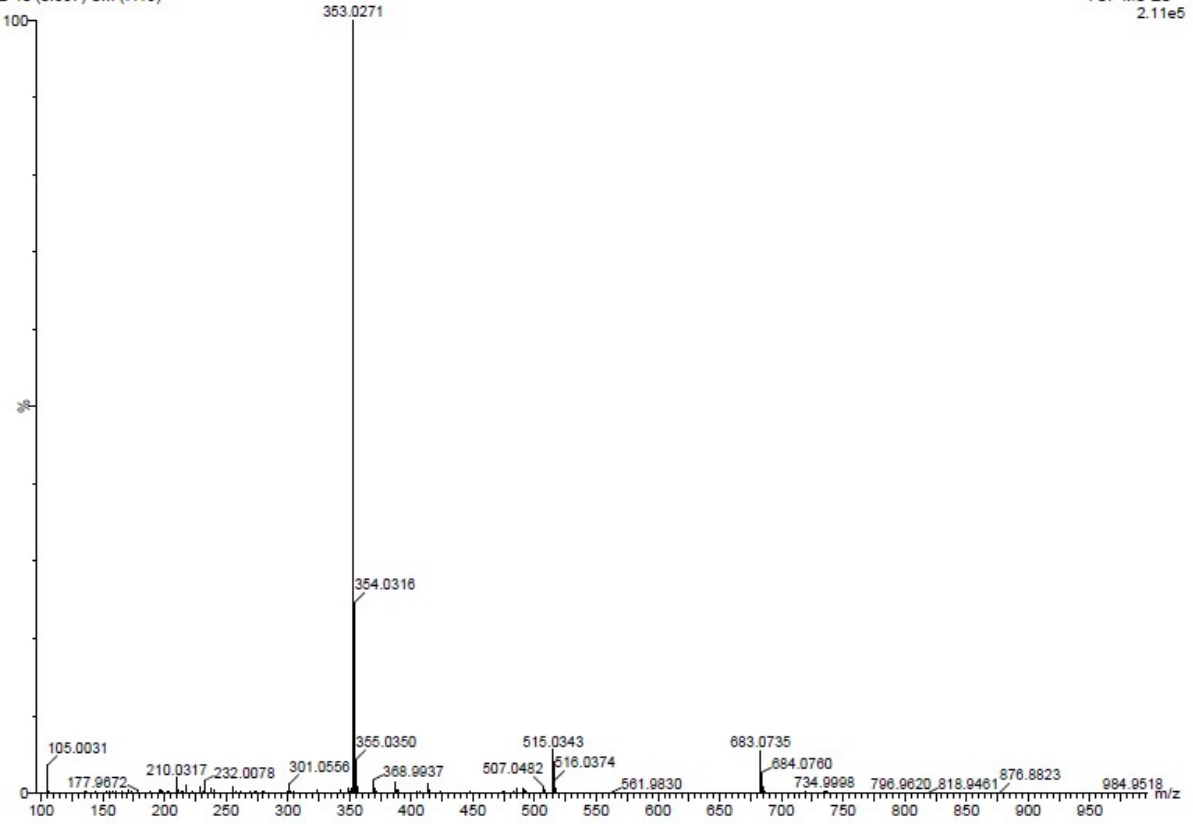

Mass spectra

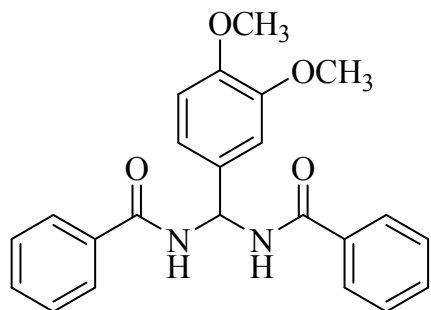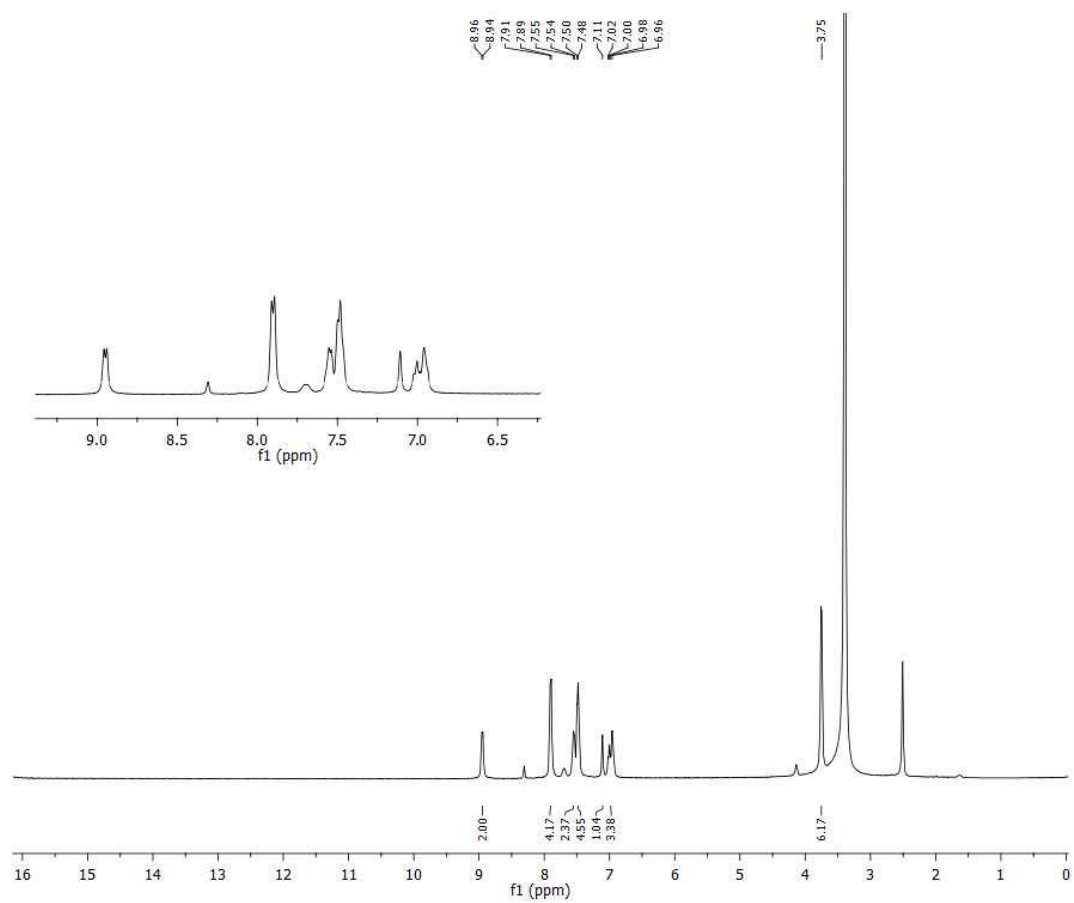

| Parameter                 | Value                                                                                              |
|---------------------------|----------------------------------------------------------------------------------------------------|
| 1 Data File Name          | C:/Users/gateway/Desktop/Bisamide my spectra clean with Cu catalyst/vertraldehyde bisamide/ 3/ fid |
| 2 Title                   | vertraldehyde bisamide                                                                             |
| 3 Comment                 | BBA                                                                                                |
| 4 Origin                  | Bruker BioSpin GmbH                                                                                |
| 5 Owner                   | nmsu                                                                                               |
| 6 Site                    |                                                                                                    |
| 7 Spectrometer            | spect                                                                                              |
| 8 Author                  |                                                                                                    |
| 9 Solvent                 | DMSO                                                                                               |
| 10 Temperature            | 295.0                                                                                              |
| 11 Pulse Sequence         | zg30                                                                                               |
| 12 Number of Scans        | 16                                                                                                 |
| 13 Receiver Gain          | 121                                                                                                |
| 14 Relaxation Delay       | 1.0000                                                                                             |
| 15 Pulse Width            | 15.0000                                                                                            |
| 16 Acquisition Time       | 4.0894                                                                                             |
| 17 Acquisition Date       | 2016-10-26T15:20:31                                                                                |
| 18 Modification Date      | 2016-10-26T15:20:56                                                                                |
| 19 Spectrometer Frequency | 400.13                                                                                             |
| 20 Spectral Width         | 8012.8                                                                                             |
| 21 Lowest Frequency       | -1535.4                                                                                            |
| 22 Nucleus                | <sup>1</sup> H                                                                                     |
| 23 Acquired Size          | 32768                                                                                              |
| 24 Spectral Size          | 65536                                                                                              |

<sup>1</sup>H NMR

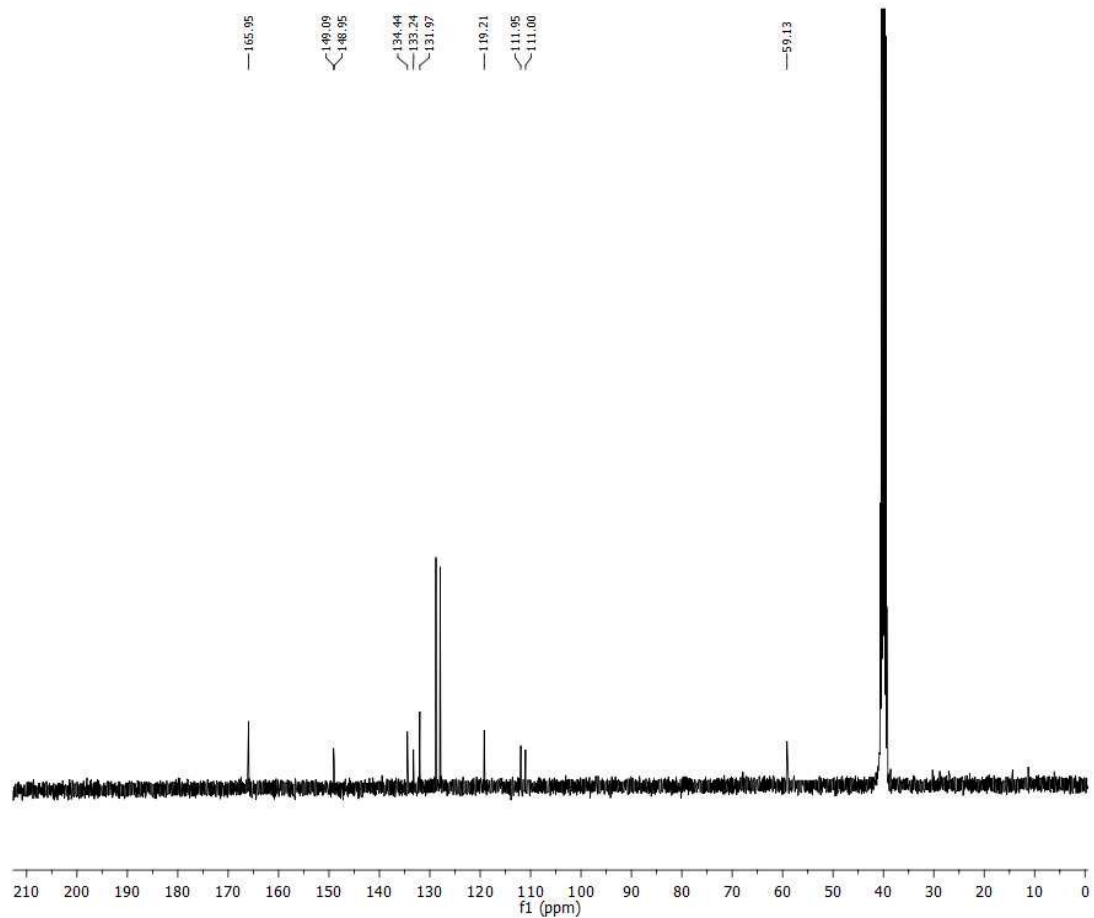

| Parameter                 | Value                                                                                              |
|---------------------------|----------------------------------------------------------------------------------------------------|
| 1 Data File Name          | C:/Users/gateway/Desktop/Bisamide my spectra clean with Cu catalyst/vertraldehyde bisamide/ 4/ fid |
| 2 Title                   | vertraldehyde bisamide                                                                             |
| 3 Comment                 | BBA                                                                                                |
| 4 Origin                  | Bruker BioSpin GmbH                                                                                |
| 5 Owner                   | nmrsu                                                                                              |
| 6 Site                    |                                                                                                    |
| 7 Spectrometer            | spect                                                                                              |
| 8 Author                  |                                                                                                    |
| 9 Solvent                 | DMSO                                                                                               |
| 10 Temperature            | 295.8                                                                                              |
| 11 Pulse Sequence         | zgpg30                                                                                             |
| 12 Number of Scans        | 724                                                                                                |
| 13 Receiver Gain          | 199                                                                                                |
| 14 Relaxation Delay       | 2.0000                                                                                             |
| 15 Pulse Width            | 9.8000                                                                                             |
| 16 Acquisition Time       | 1.3631                                                                                             |
| 17 Acquisition Date       | 2016-10-26T15:24:51                                                                                |
| 18 Modification Date      | 2016-10-26T16:03:31                                                                                |
| 19 Spectrometer Frequency | 100.61                                                                                             |
| 20 Spectral Width         | 24038.5                                                                                            |
| 21 Lowest Frequency       | -1958.9                                                                                            |
| 22 Nucleus                | 13C                                                                                                |
| 23 Acquired Size          | 32768                                                                                              |
| 24 Spectral Size          | 65536                                                                                              |

13C NMR



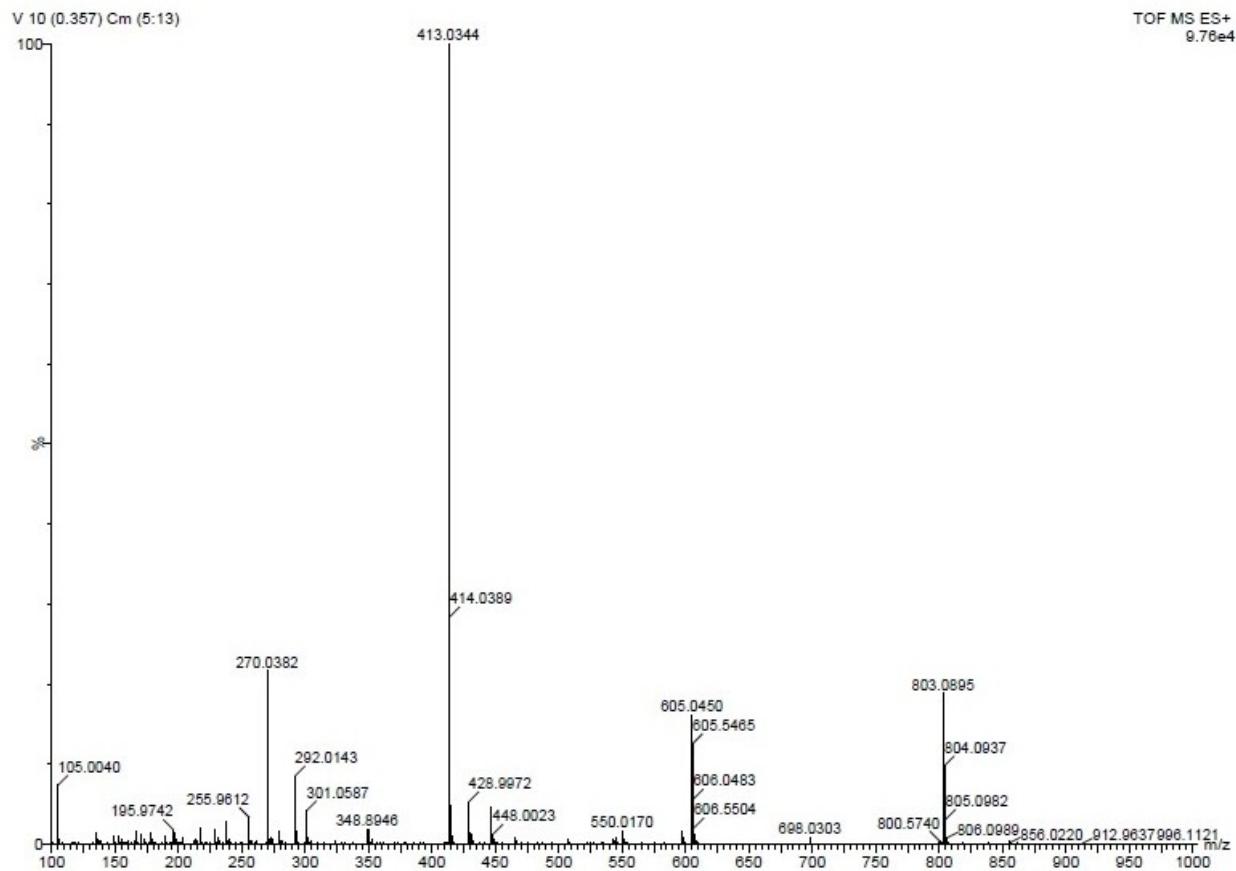

Mass Spectra
